# Supplementary material for: Promoter-specific dynamics of TATA-binding protein association with the human genome
Source: PubMed Central journal article supplement — Genome Res. 2019 Dec;29(12):1939–50. doi: 10.1101/gr.254466.119 (PMC6886507; doi:10.1101/gr.254466.119), 2019-12
Supplement: supp_gr.254466.119_Supplemental_Material_.pdf [file supp_gr.254466.119_Supplemental_Material_.pdf]

## **Supplemental Material**

### **Promoter-specific dynamics of TATA-binding protein association with the human genome**

Yuko Hasegawa and Kevin Struhl

#### **Table of Contents**

- Supplemental methods
- Supplemental Figures S1 to S10
- Supplemental Tables S1 to S3

## SUPPLEMENTAL METHODS

### Plasmid construction

The DNA fragment coding 3xHA was prepared by annealing oligos (Supplementary Table 2,) and inserted between the *Bam*HI and *Eco*RI sites of pBudCE4.1 (Invitrogen). The ERT2 DNA fragment was PCR amplified from pCAG-Cre-ERT2 (Addgene #14797) using 1Fw and 1Rv primers and inserted between *Sal*I and *Bam*HI sites of pBudCE4.1-3xHA. ERT2-3HA fragment was then PCR amplified using 2Fw and 2Rv primers and inserted between *Bmt*I and *Bam*HI sites of pmCherry-C1 (Clontech). The TBP coding sequence was PCR amplified from human cDNA and was cloned into *Sal*I site of this plasmid containing ERT2-3HA, yielding pCMV-TBP-ERT2-3HA.

### Cell culture

pCMV-TBP-ERT2-3HA construct was transfected to HEK293 (ATCC) cells, and the stable line was established by G418 selection. Cells were routinely cultured in phenol-red free DMEM containing 10% FBS.

### Nuclear and nucleolar fractionation

Cells cultured in 6 cm dish were washed twice with ice-cold PBS twice, then scraped and collected in 1.5 ml tubes. After brief centrifugation, cells were suspended in 250  $\mu$ l of CE buffer (10 mM Hepes-KOH (pH7.5), 1.5 mM MgCl<sub>2</sub>, 10 mM KCl, 0.05% NP-40) and incubated for 3 min on ice. Cells were again centrifuged for 3 min at 3,000 rpm, and the pellet were suspended in 250  $\mu$ l of RIPA buffer (50 mM Tris-HCl (pH8.0), 150 mM NaCl, 5 mM EDTA, 1% Triton X-100, 0.5% Na-Deoxycholate, 0.1% SDS) and sonicated (Misonix 3000,

level 2, on 30 sec off 30 sec, total 2 min). After centrifugation for 12,000 rpm for 10 min, the supernatant was collected and used as the nuclear fraction. For quantification of the protein, we performed western blotting and detected TBP-ERT2 and endogenous TBP using anti-TBP antibody (Abcam #ab51841). The signals were detected by LAS3000 imaging system and analyzed by ImageJ software.

To isolate nucleoli, cells in five 150-mm dishes were trypsinized and collected in the 15 ml tubes, then suspended in ice-cold CE buffer without detergent (10 mM Hepes-KOH (pH7.9), 1.5 mM MgCl<sub>2</sub>, 10 mM KCl, 0.5 mM DTT) and incubated for 5 min on ice. The cell suspension was transferred to pre-chilled 7 ml Dounce tissue homogenizer, and homogenized to obtain nuclei. After centrifuge and removed supernatant, the nuclear pellet was suspended in 3 ml of S1 buffer (0.25 M Sucrose, 10 mM MgCl<sub>2</sub>) and then put on the top of 3 ml S2 buffer (0.35 M Sucrose, 0.5 mM MgCl<sub>2</sub>). The tube was centrifuged at 2,500 rpm for 5 min at 4°C, and after that supernatant was removed. The pellet was suspended in 3 ml of S2 buffer and sonicated for 3 x 10 sec using a probe sonicator. The sonicated solution was layered onto 3 ml of S3 buffer (0.88 M Sucrose, 0.5 mM MgCl<sub>2</sub>), and centrifuged for 10 min at 3,500 rpm, 4°C. The pellet containing nucleolus was washed with 500 µl of S2 buffer, spun down at 3,500 rpm for 5 min and then used for the assay.

### **Sample preparation during the time course**

TBP-ERT2 nuclear translocation was induced by 4OHT (Sigma-Aldrich, H7904) addition at the final concentration of 100 nM to culture medium. Cells were retained in the CO<sub>2</sub> incubator for indicated times. For western blotting, cells were immediately put on ice, and proceed to the subcellular fractionation. For ChIP, culture medium was removed and then exchanged by fixing solution (see below) at room temperature to avoid over crosslinking. This step takes 2.5 minutes, thus we summed up this time gap and incubation time and used as real time points (7.5, 12.5, 17.5, 32.5, 62.5, 92.5, 362.5, 1442.5 min) for simulating turnover rate.

### **Chromatin immunoprecipitation**

Chromatin was prepared from two 150 mm dishes. After removing the culture medium, cells were fixed at room temperature with fixing solution (1% formaldehyde, methanol-free in DMEM without serum) for 10 min. Fixation was stopped by adding 125 mM glycine. Cells were washed with ice-cold PBS twice, and then scraped from dishes and collected. Cells were suspended in 2 ml Lysis Buffer 1 (50 mM Hepes-KOH (pH7.5), 140 mM NaCl, 1mM EDTA, 10% Glycerol, 0.5% NP-40, 0.25% Triton X-100, with protease inhibitor and phosphatase inhibitor), rotated for 10 min at 4°C. After collecting cells by centrifugation, cells were re-suspended in 2 ml Lysis Buffer 2 (10 mM Tris-HCl (pH8.0), 200 mM NaCl, 1 mM EDTA, 0.5 mM EGTA, with protease inhibitor and phosphatase inhibitor) and rotated for 10 min at 4°C. Cells were collected by centrifugation and re-suspended in 1.3 ml Lysis Buffer 3 (10 mM Tris-HCl (pH8.0), 100 mM NaCl, 1 mM EDTA, 0.5 mM EGTA, 0.1% Sodium deoxycholate, 0.5% N-Lauroylsarcosine, with protease inhibitor and phosphatase inhibitor), and then sonicated (Misonix 3000 sonicator, level 2, ON 30 sec, OFF 30 sec, 7 cycles (total sonication time is 3.5 min)). Majority of the fragment sizes were approximately 200-500 bp. Cell lysates were centrifuged at 12,000 rpm for 10 min at 4°C after adding Triton X-100 (1% final concentration), and the supernatants were used for the analysis. The protein concentration of the lysates was measured by BCA Protein Assay Kit (Thermo Scientific) and the amounts of the lysates yielding 1.3  $\mu$ g total protein were used for immunoprecipitation. The volume of the lysates were adjusted to 1 ml by adding Lysis Buffer 3. For sequencing samples, yeast chromatin prepared from HA-TBP expressing strain were added at the constant ratio (0.039  $\mu$ g total protein in the lysate, that corresponds to 3% of total human protein amount in the lysates) to the human cell lysates as a spike-in control. 1/10 volumes of the mixed lysates were kept as input samples. 0.3  $\mu$ g of anti-HA antibody (Santa Cruz #sc-7392) or 3  $\mu$ g of anti-TBP antibody (Abcam #ab51841) was added to the lysates, and the mixtures were rotated overnight at 4°C. Immunoprecipitation was performed at 4°C for 3 hr with 50  $\mu$ l protein G dynabeads (Thermo Fisher). Beads were washed five times with ice-cold Wash buffer 1 (50 mM Hepes-KOH

(pH7.6), 500 mM LiCl, 1 mM EDTA, 1% NP-40, 0.7% Sodium deoxycholate) and rinsed with TE (10 mM Tris-HCl (pH8.0), 1 mM EDTA) with 50 mM NaCl. Immunoprecipitates were eluted by incubating the beads in 75  $\mu$ l Elution buffer (50 mM Tris-HCl (pH 8.0), 10 mM EDTA, 1% SDS) at 65°C for 15 min and collecting the supernatants. This step was repeated twice. The eluted samples were incubated overnight at 65°C for de-crosslinking. After treating with RNase A and Proteinase K, DNA was purified with PCR purification kit (QIAGEN) by adding 100  $\mu$ l water. 55.5  $\mu$ l of eluted DNA from IP samples and 2.5  $\mu$ l of eluted DNA (diluted to 1/10) from input samples were used for the library preparation. For qPCR analysis, 3.3  $\mu$ l of eluted DNA from IP samples and four dilution series of input samples for standards were used. Primers are listed in Supplementary Table 2.

### **Yeast chromatin preparation**

HA-TBP yeast strain was grown in YPD at 30 °C to an 0.4 OD600 and fixed for 20 min at room temperature with final 1% formaldehyde. Then the fixation was quenched with final 250 mM glycine for 5 min at room temperature. Cells were collected and washed with PBS once, and were disrupted in Mini Bead Beater (BioSpec Products, Inc.) with 3 cycles of 5 min run at maximum speed and 1 min rest on ice following suspending in 400  $\mu$ l of FA lysis buffer (50 mM Hepes-KOH (pH7.5), 150 mM NaCl, 1% Triton X-100, 0.1% Sodium deoxycholate, 0.1% SDS). After centrifugation and removal of the supernatant, the pellet was suspended in 480  $\mu$ l of FA lysis buffer and sonicated (Misonix 3000 sonicator, level 6, ON 10 sec, OFF 10 sec, 21 cycles (total sonication time is 3.5 min) x 6 times with 1 min interval). The sample was centrifuged at maximum speed at 4°C for 20 min, and then the supernatant was collected and used as yeast chromatin.

### **Library preparation and sequencing**

Sequencing library preparation was performed with NEBNext Ultra DNA library prep kit (NEB #E7370S) and NEBNext Multiplex Oligos (NEB #E7335S) following the

manufacturer's instructions. PCR cycles for amplification of adaptor-ligated DNA were 9 cycles for input samples and 14 cycles for IP samples. Large fragments were removed using 0.4 x AMPure beads (Beckman Coulter). Libraries were sequenced on NextSeq 500.

### **ChIP-seq computational analysis**

We concatenated the genome sequences of human (hg38) and cerevisiae (sacCer3) to generate a combined genome sequence. We added “\_s” to all yeast chromosome names to avoid chromosome name duplication, and built a custom Bowtie2 index from this combined genome sequence. Sequenced reads were aligned to this custom library with default parameters (--sensitive). The resulting SAM files were then split into the two files containing reads mapped to human chromosomes and mapped to yeast chromosome. Duplicates were removed by Picard, and only reads exceed mapping quality 30 were retained except for specific analysis (repetitive genes including ribosomal DNA). The number of reads mapped to human or yeast genomes and that passed the quality filter are listed in Supplementary Table 1. We calculated RRPM (reference adjusted RPM) by dividing the number of the reads mapped to human genome loci by the total reads number mapped to yeast genome (the numbers in the MQ>30 column in Supplementary Table 1, and that in the MQ>0 column for repetitive gene analysis). This RRPM value was used as the intensity of the ChIP signal in this study. Peak calling was performed using MACS2 with a *P*-value threshold of 0.01. We extracted 13,148 peaks that were called at least two samples in the later time points (60, 90, 360, 1440 min). Peak annotation was performed using UROPA with custom GTF file combined GRCh38.94 and tRNA GTF files downloaded from Ensembl and UCSC genome browser respectively.

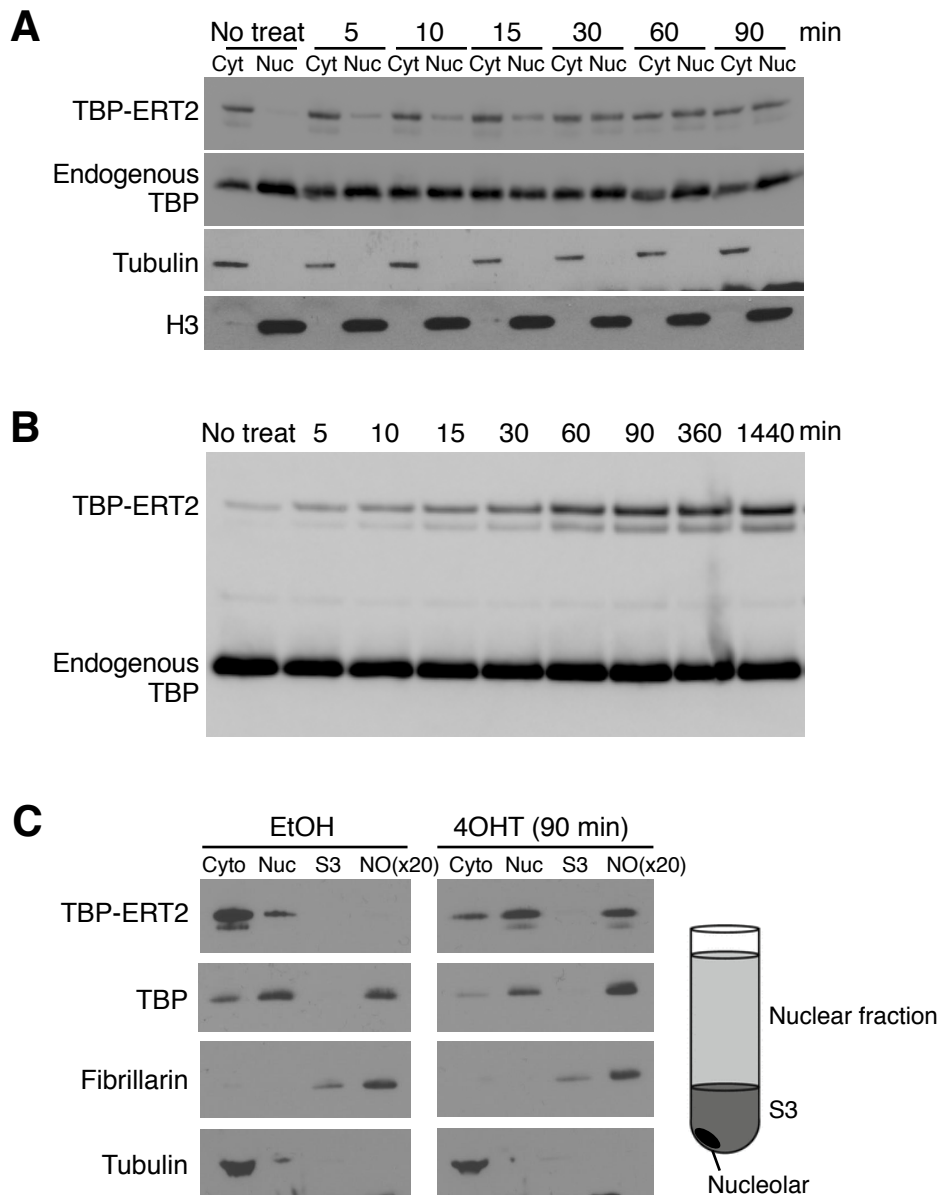

**Supplemental Fig. S1.** TBP-ERT2 localizes to the nucleus upon tamoxifen treatment. (A) Western blotting analysis of TBP-ERT2, endogenous TBP, Tubulin alpha (cytoplasmic marker), and Histone H3 (nuclear marker) in the cytoplasmic (Cyt) and the nuclear (Nuc) fraction following the given time after tamoxifen treatment. (B) Western blotting analysis of TBP-ERT2 and endogenous TBP in nuclear fraction. (C) Western blotting analysis of TBP-ERT2, endogenous TBP, Fibrillarin (nucleolar marker), and Tubulin alpha (cytoplasmic marker) in the cytoplasmic (Cyt), nuclear (Nuc), S3, and nucleolar (NO) fraction before (EtOH) and 90 min after tamoxifen treatment (4OHT). Nucleolar fraction was concentrated to 20-fold.

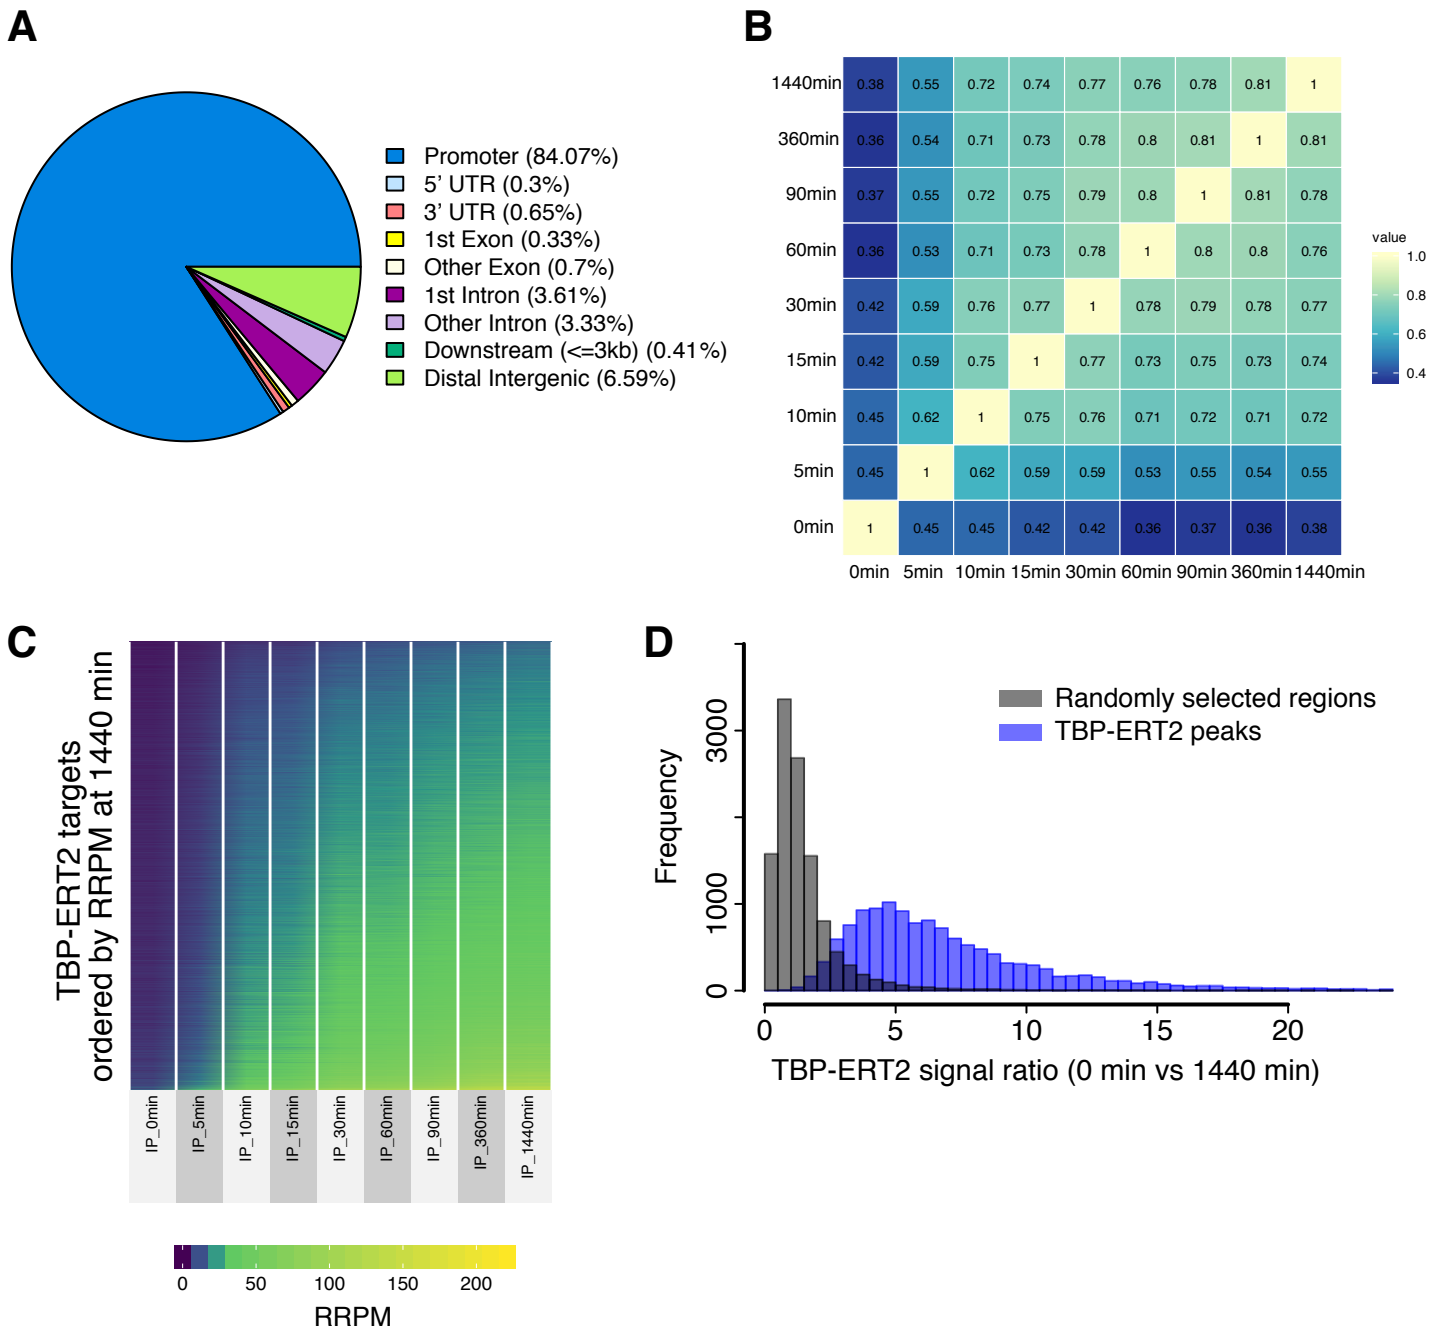

**Supplemental Fig. S2.** TBP-ERT2 ChIP signal gradually increases after tamoxifen treatment. (A) Location of TBP-ERT2 peaks. (B) Spearman correlation of ChIP-seq signal at peaks between samples at a given time point after tamoxifen induction. (C) ChIP-seq signal (RRPM: Reference-adjusted RPM) at each target site through time-course. (D) Histogram of the frequency (number) of regions or TBP-ERT2 peaks having indicated ChIP-seq signal ratio between 0 min and 1440 min samples.



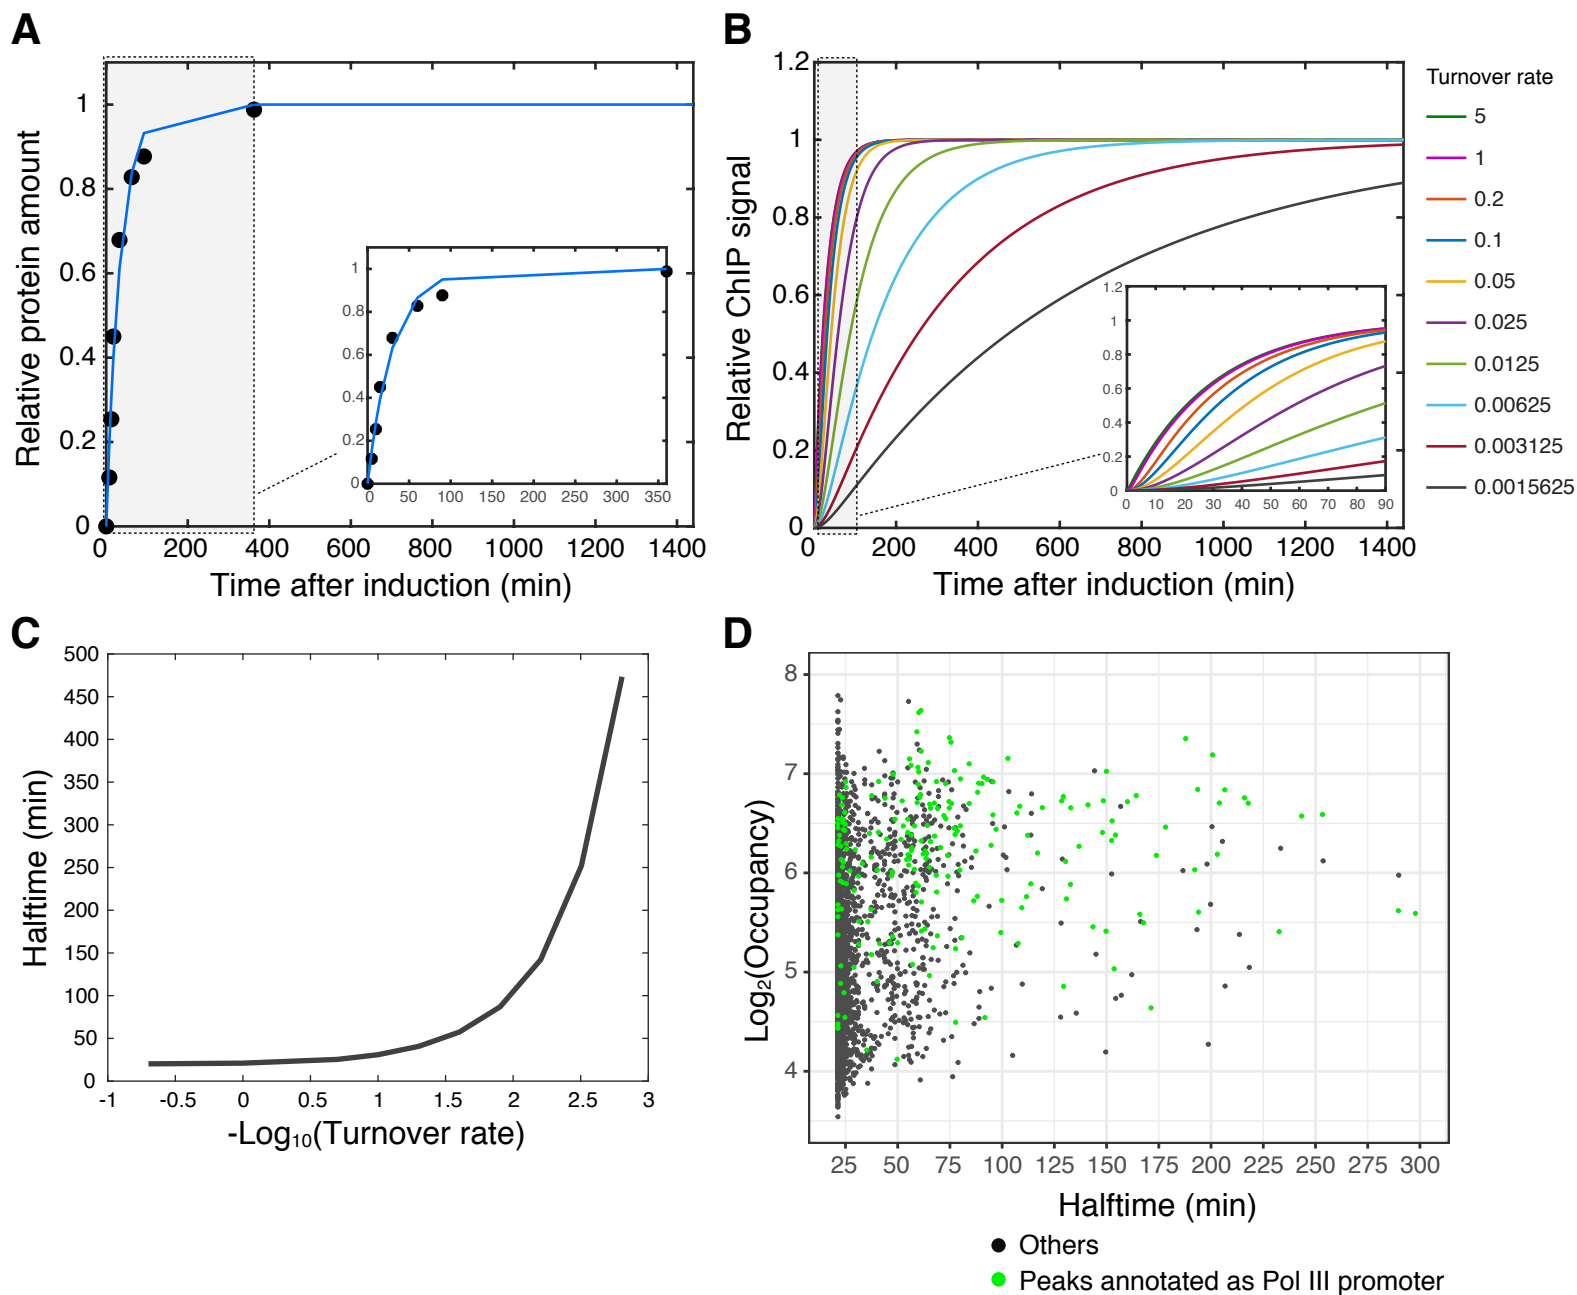

**Supplemental Fig. S3.** ChIP signal increasing is reflected in the binding turnover rate. (A) Change of the nuclear TBP-ERT2 amount over the time-course. Markers are real data measured by western blotting (means of the three independent analyses) and the line is simulated change of the protein amount based on the equation describing nuclear translocation of the protein (Methods). Small window indicates the enlargement of the data at the early time points. (B) Simulated increase of the relative ChIP signal with various  $\lambda$  (binding turnover rate) values. Small window indicates the enlargement of the data at the early time points. (C) Relation between  $\lambda$  (binding turnover rate) and half-time (time point where the relative ChIP signal reaches to 0.5). (D) Scatter plot of TBP-ERT2 peaks in  $\log_2$  occupancy vs half-time. Green color indicates peaks annotated as pol III genes. Black are the others.

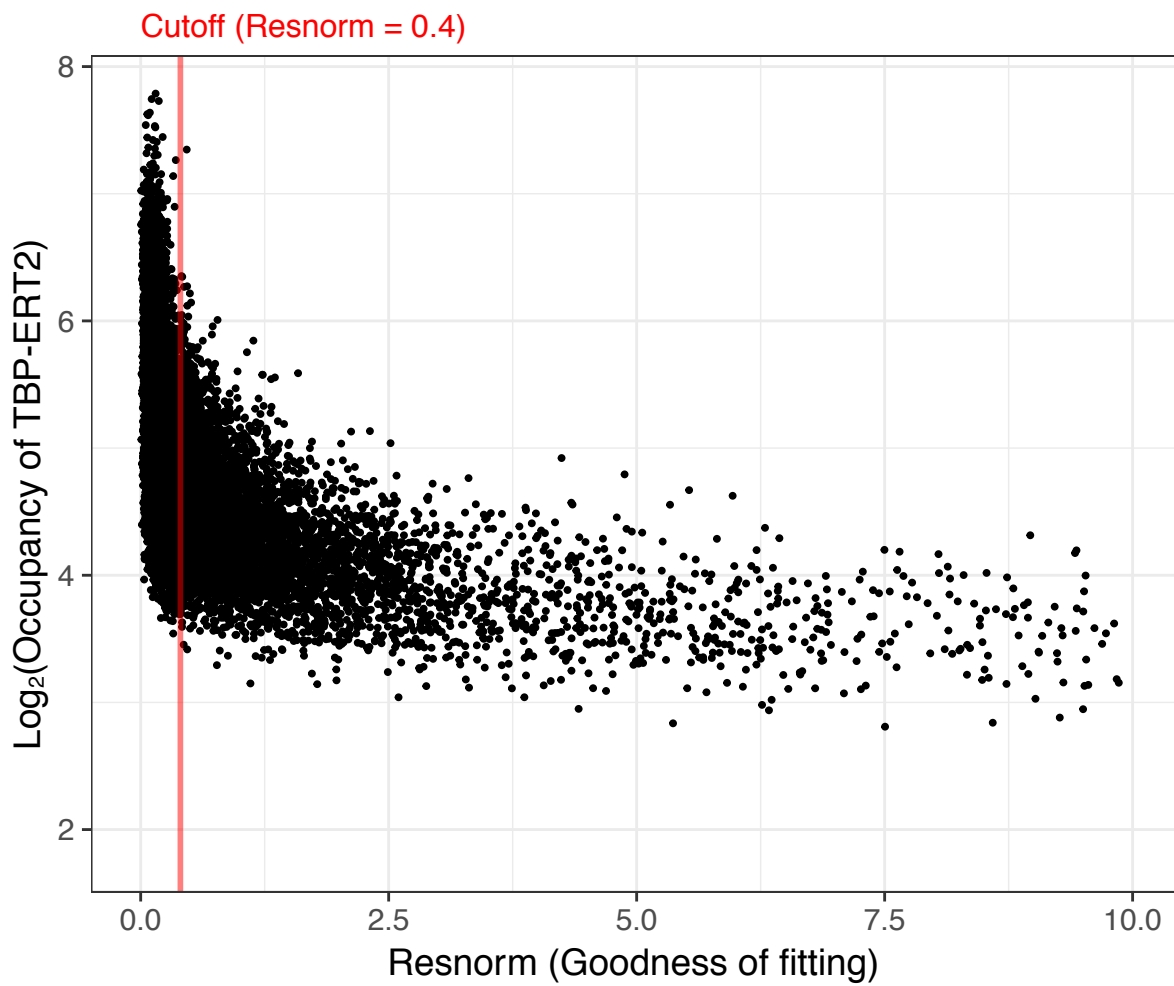

**Supplemental Fig. S4.** Cutoff for peaks that we set based on Goodness-of-fitting.

**A**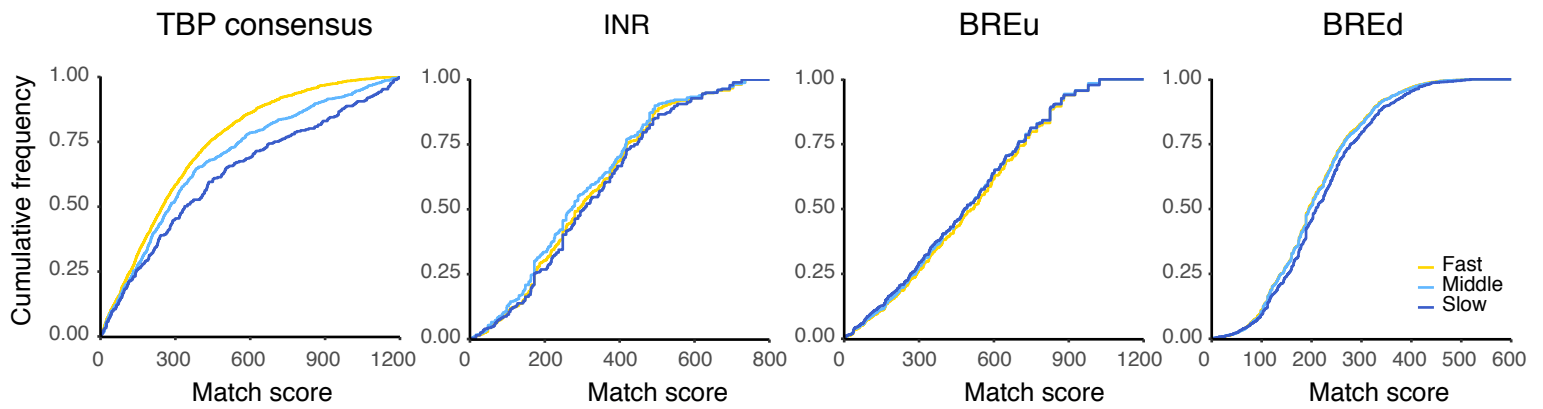**B**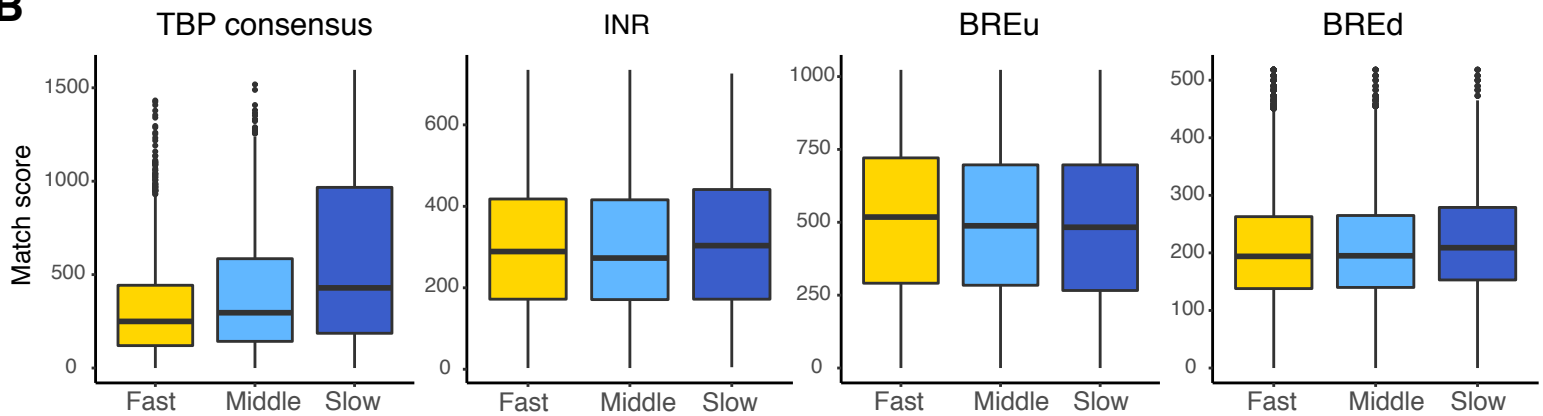

**Supplemental Fig. S5.** Analysis of motifs in Pol II core promoter. (A) Cumulative frequencies of match score of hit sequences (forward direction) to each motif in  $\pm 100$  bp region ( $\pm 10$  bp region for INR) from gene start site. (B) Boxplots of the highest match score of hit sequences (forward direction).

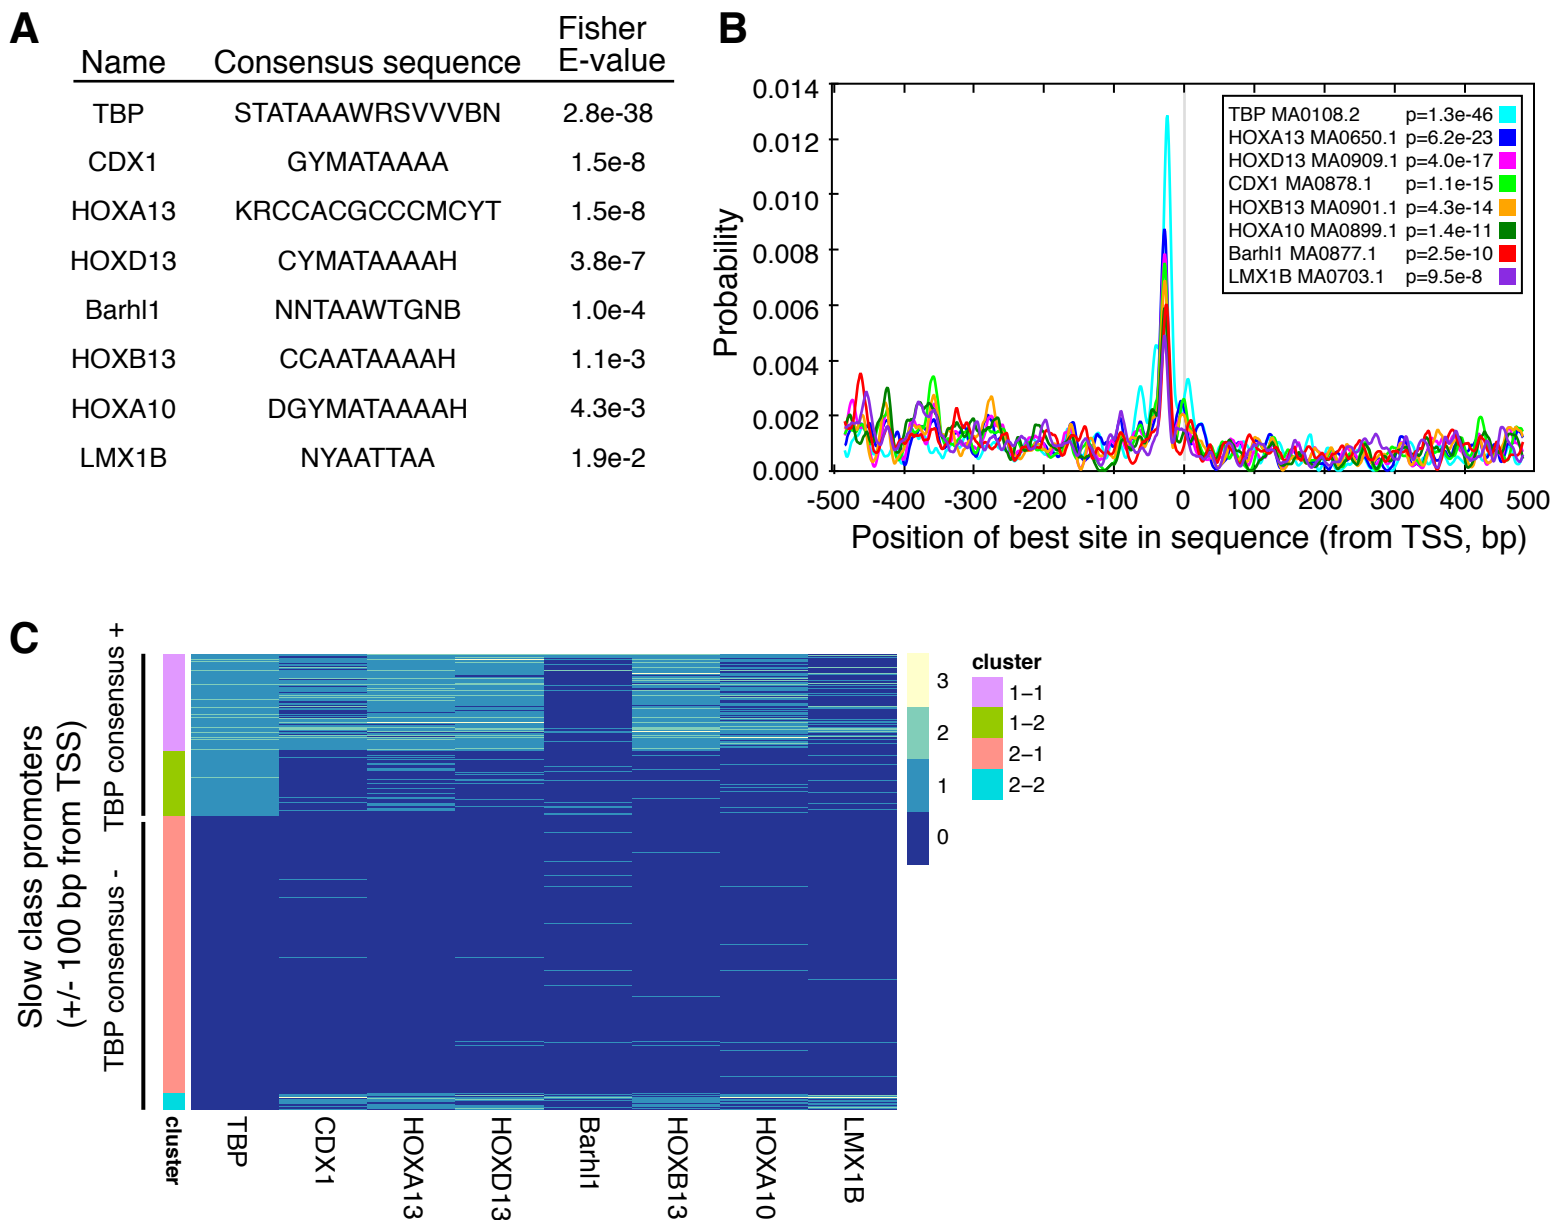

**Supplemental Fig. S6.** Known TF binding motifs enriched in slow class promoters searched by CentriMo (<http://meme-suite.org/doc/centrimo.html>). (A) The list of TFs of which binding motifs are significantly enriched in Slow class promoters (Fisher E-value < 0.05,  $\pm$  500 bp from TSS). (B) Location of the best hit sites in the sequences. (C) Occurrences of TF binding motifs in Slow class promoters ( $\pm$ 100 bp from TSS).

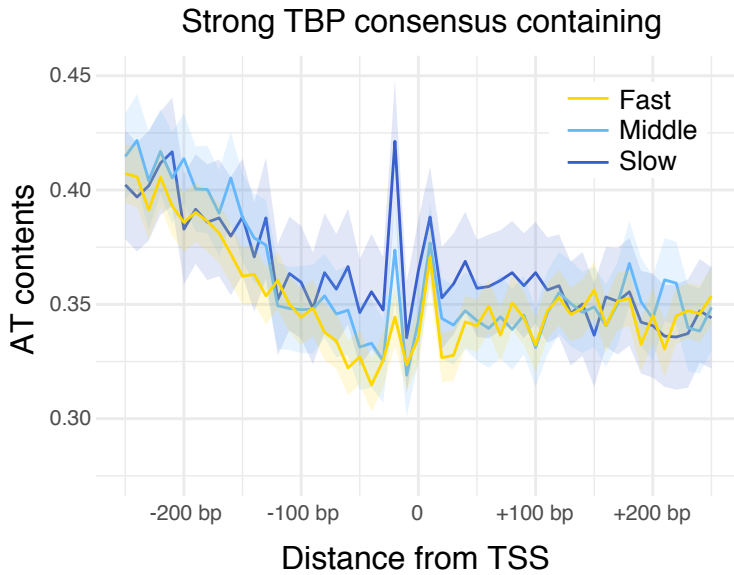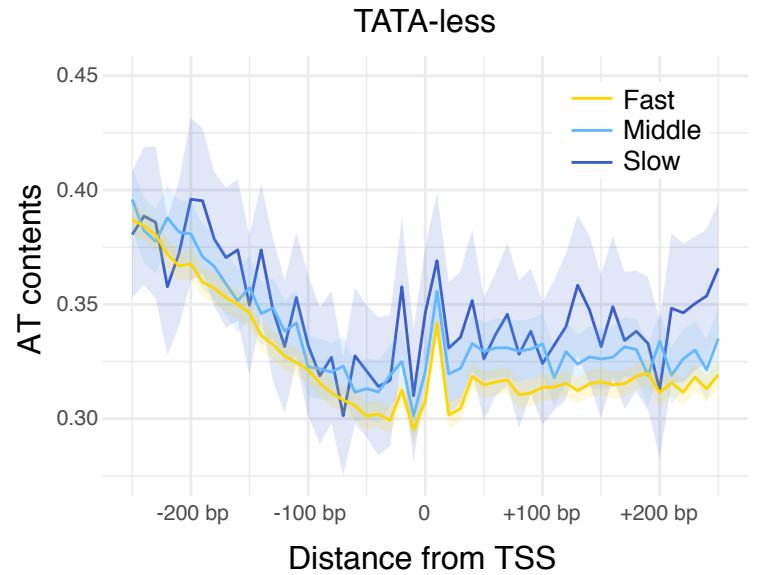

**Supplemental Fig. S7.** TATA-less pol II promoters in Slow class tend to have higher AT content. Average AT-contents in the promoters containing strong TBP consensus (left) or TATA-less promoters (right). Promoters that have strong TBP consensus ( $P$ -value  $< 0.0001$ , PWMtools) or TATAWAW (RSAT, pattern matching) are categorized as Strong TBP consensus containing ( $n=1459$ , Fast  $n=895$ , Middle  $n=415$ , Slow  $n=149$ ). Rest were categorized in TATA-less ( $n=4164$ , Fast  $n=3201$ , Middle  $n=700$ , Slow  $n=263$ ). Shadow areas represent 95% confidence intervals for the means.

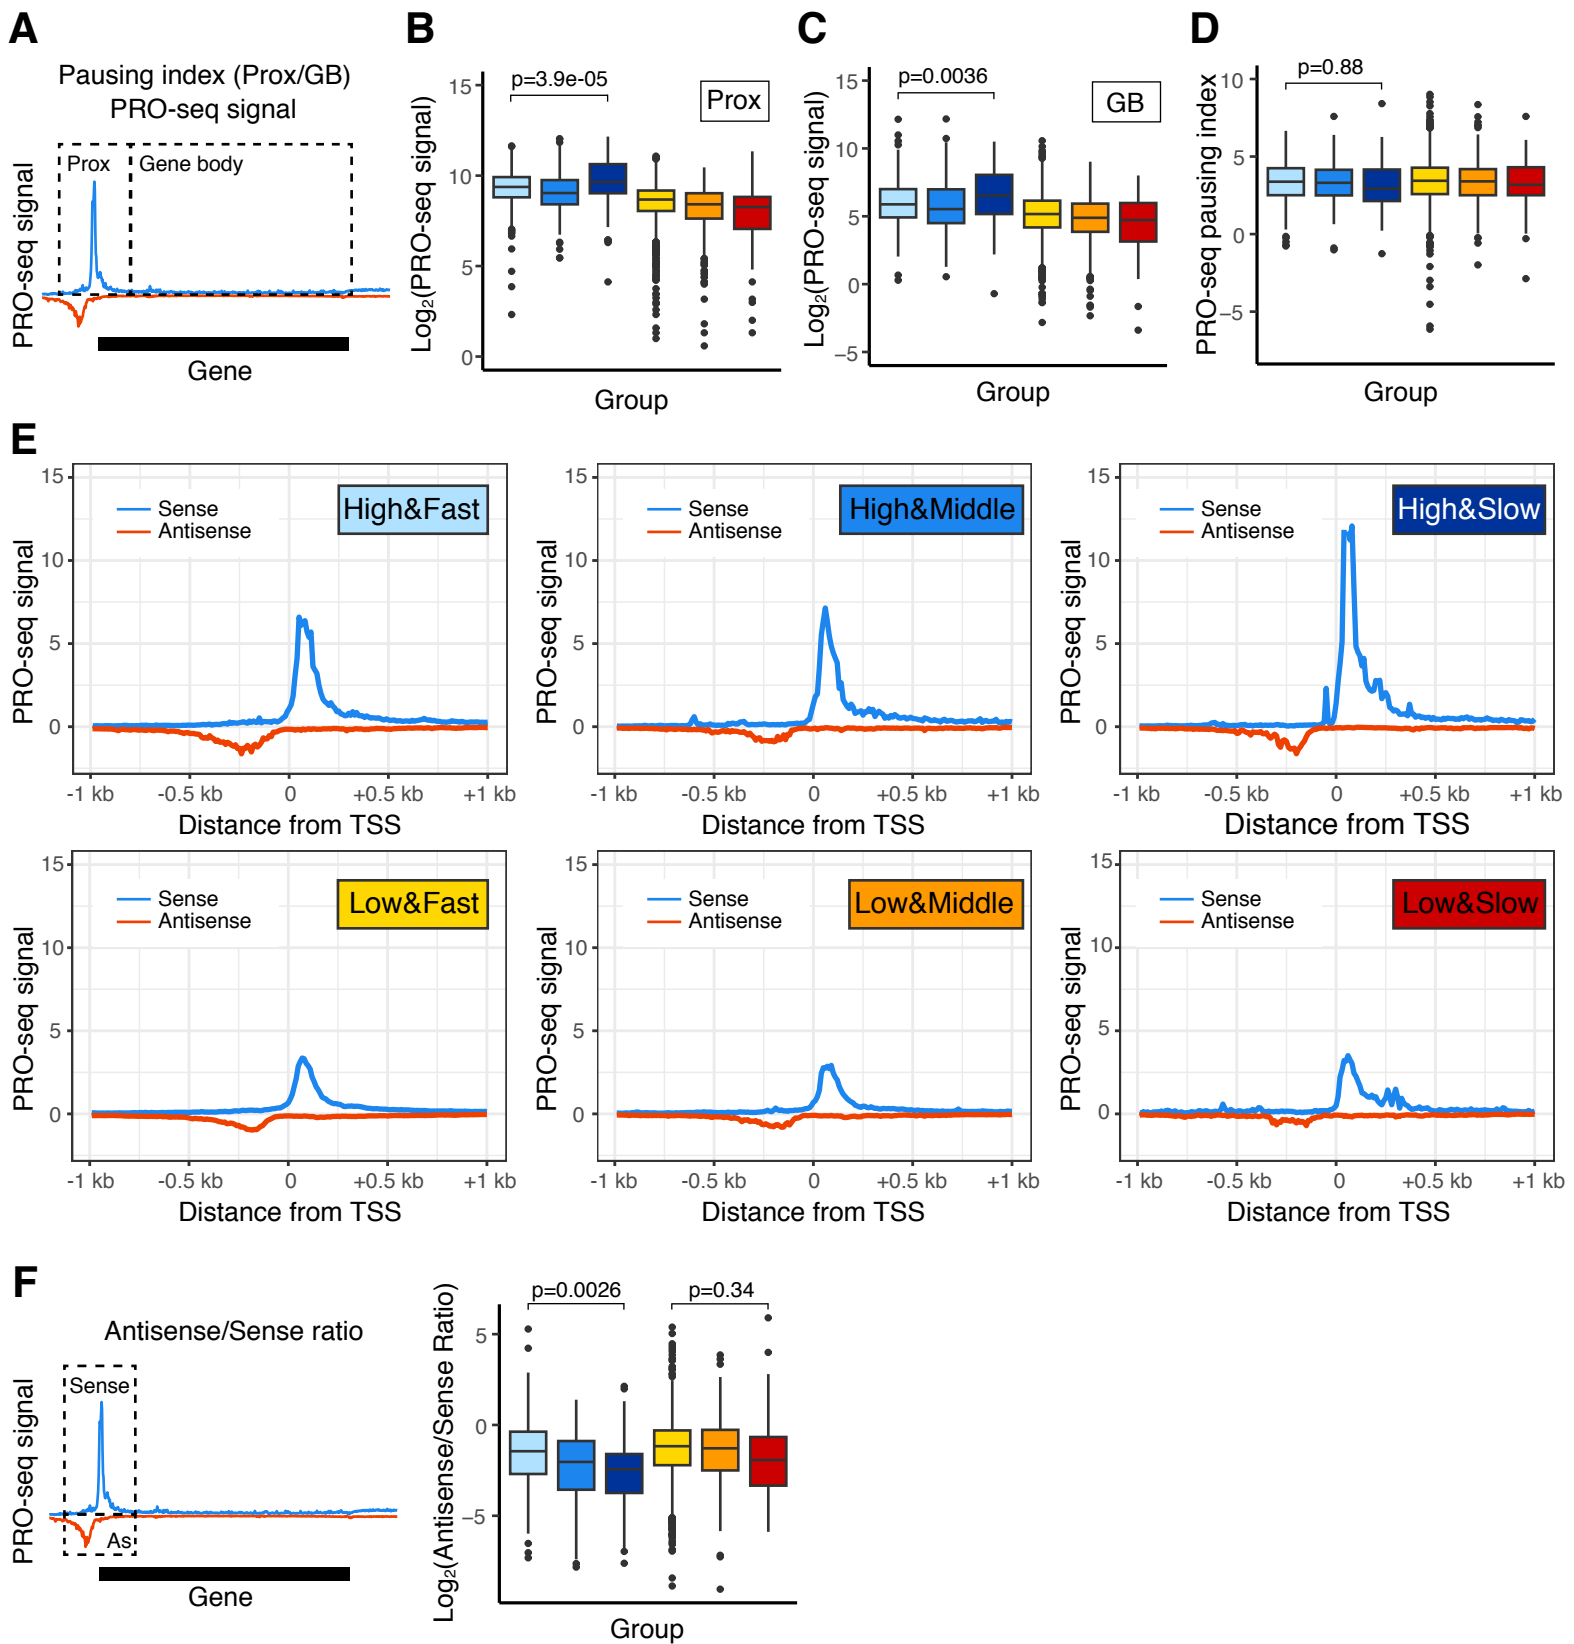

**Supplemental Fig. S8.** Polymerase pausing does not associate with the binding turnover rate of TBP, and High and Slow class Pol II promoters show strong transcription in sense direction. (A) Schematic illustration of the proximal region (Prox: from -500-bp to +500-bp of TSS) and the gene body region (GB: from +500-bp of TSS to TES). (B) PRO-seq signal (Woo et al. 2018\*) in the proximal region. (C) PRO-seq signal in the gene body (GB) region. (D) Pausing index. *P*-values are *t*-test results. (E) PRO-seq signal in sense (blue) and anti-sense (red) direction. (F) Schematic illustration of the region (from -500-bp to +500-bp of TSS) for counting PRO-seq signal (left), and  $\log_2$  ratio between anti-sense and sense PRO-seq signal (right). *P*-values are *t*-test results.

\*Woo YM, Kwak Y, Namkoong S, Kristjansdottir K, Lee SH, Lee JH, Kwak H. 2018. TED-Seq Identifies the Dynamics of Poly(A) Length during ER Stress. *Cell Rep* 24: 3630-3641 e3637.

| Motif                                         | Logo                                                                               | 3 Top hits in databases                                          |
|-----------------------------------------------|------------------------------------------------------------------------------------|------------------------------------------------------------------|
| oligos_6nt_test_vs_ctrl_m1<br>E-value=9.1e-12 | 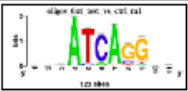  | versus jaspar core nonredundant vertebrates: Dux, SIX1, GATA5,   |
| oligos_6nt_test_vs_ctrl_m2<br>E-value=9.3e-07 |   | versus jaspar core nonredundant vertebrates: EWSR1_FLI1,         |
| oligos_6nt_test_vs_ctrl_m3<br>E-value=2.6e-06 |   | versus jaspar core nonredundant vertebrates: no match            |
| oligos_6nt_test_vs_ctrl_m4<br>E-value=3.7e-05 |   | versus jaspar core nonredundant vertebrates: no match            |
| oligos_6nt_test_vs_ctrl_m5<br>E-value=6.3e-05 |   | versus jaspar core nonredundant vertebrates: no match            |
| oligos_7nt_test_vs_ctrl_m1<br>E-value=3.5e-22 |   | versus jaspar core nonredundant vertebrates: YY2, NFIX,          |
| oligos_7nt_test_vs_ctrl_m2<br>E-value=4.1e-20 |   | versus jaspar core nonredundant vertebrates: Hand1_Tcf3,         |
| oligos_7nt_test_vs_ctrl_m3<br>E-value=4.4e-18 |   | versus jaspar core nonredundant vertebrates: Dux, NFYA,          |
| oligos_7nt_test_vs_ctrl_m4<br>E-value=3.9e-14 |   | versus jaspar core nonredundant vertebrates: TEAD4, TEAD1, ELF5, |
| oligos_7nt_test_vs_ctrl_m5<br>E-value=3.9e-14 |  | versus jaspar core nonredundant vertebrates: LIN54, Nr2e1, Dux,  |

**Supplemental Fig. S9.** Discovered motifs enriched in high TBP occupancy and fast TBP turnover class of promoters that are strongly transcribed (PoI II-ser5 ChIP signal of Fig. 4D > 1; n = 219) compared to high occupancy and slow turnover with similar transcriptional activity (n = 125).

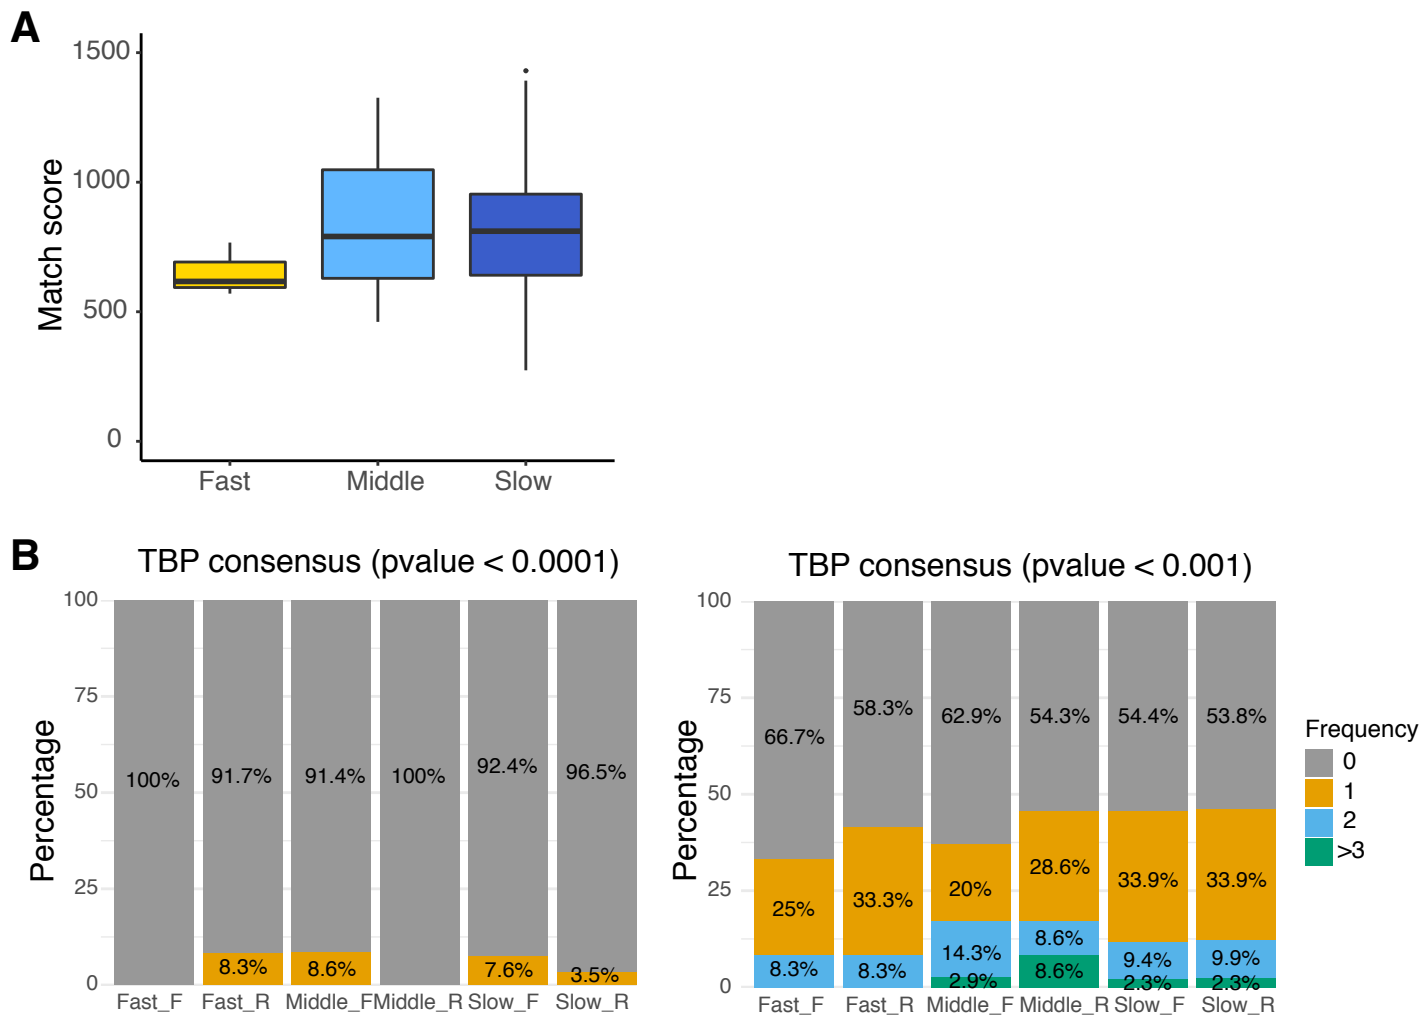

**Supplemental Fig. S10.** TBP consensus motif in Pol III genes. (A) Boxplots of the highest match score of hit sequences in forward direction. (B) Percentages of the pol III promoters (pseudogenes were removed, n=217, Fast n=11, Middle n=35, Slow=171) that have hit sequences to TBP consensus motif (left:  $P$ -value < 0.0001, right:  $P$ -value < 0.001, PWMtools).



| Sample        | Total reads | Mapped 0 times | % in the total reads | Mapped     | % in the total reads | Mapped to hg38 | % in the mapped reads | Mapped to sacCer3 | % in the mapped reads |
|---------------|-------------|----------------|----------------------|------------|----------------------|----------------|-----------------------|-------------------|-----------------------|
| input_0min    | 32,834,384  | 544,285        | 1.7%                 | 32,290,099 | 98.3%                | 32,251,821     | 99.9%                 | 38,278            | 0.1%                  |
| input_5min    | 40,468,937  | 565,707        | 1.4%                 | 39,903,230 | 98.6%                | 39,828,313     | 99.8%                 | 74,917            | 0.2%                  |
| input_10min   | 34,332,896  | 531,837        | 1.5%                 | 33,801,059 | 98.5%                | 33,735,832     | 99.8%                 | 65,227            | 0.2%                  |
| input_15min   | 45,183,241  | 640,534        | 1.4%                 | 44,542,707 | 98.6%                | 44,471,017     | 99.8%                 | 71,690            | 0.2%                  |
| input_30min   | 54,189,936  | 727,886        | 1.3%                 | 53,462,050 | 98.7%                | 53,330,184     | 99.8%                 | 131,866           | 0.2%                  |
| input_60min   | 43,575,407  | 678,361        | 1.6%                 | 42,897,046 | 98.4%                | 42,787,995     | 99.7%                 | 109,051           | 0.3%                  |
| input_90min   | 39,602,962  | 646,229        | 1.6%                 | 38,956,733 | 98.4%                | 38,866,732     | 99.8%                 | 90,001            | 0.2%                  |
| input_360min  | 41,574,884  | 680,870        | 1.6%                 | 40,894,014 | 98.4%                | 40,797,127     | 99.8%                 | 96,887            | 0.2%                  |
| input_1440min | 44,255,025  | 680,279        | 1.5%                 | 43,574,746 | 98.5%                | 43,482,779     | 99.8%                 | 91,967            | 0.2%                  |
| IP_0min       | 61,463,578  | 1,412,705      | 2.3%                 | 60,050,873 | 97.7%                | 56,694,056     | 94.4%                 | 3,356,817         | 5.6%                  |
| IP_5min       | 48,153,540  | 970,311        | 2.0%                 | 47,183,229 | 98.0%                | 45,245,093     | 95.9%                 | 1,938,136         | 4.1%                  |
| IP_10min      | 62,715,387  | 1,127,539      | 1.8%                 | 61,587,848 | 98.2%                | 59,532,301     | 96.7%                 | 2,055,547         | 3.3%                  |
| IP_15min      | 46,491,870  | 1,030,356      | 2.2%                 | 45,461,514 | 97.8%                | 43,406,502     | 95.5%                 | 2,055,012         | 4.5%                  |
| IP_30min      | 59,597,348  | 1,242,744      | 2.1%                 | 58,354,604 | 97.9%                | 56,383,307     | 96.6%                 | 1,971,297         | 3.4%                  |
| IP_60min      | 56,181,699  | 1,250,257      | 2.2%                 | 54,931,442 | 97.8%                | 52,472,684     | 95.5%                 | 2,458,758         | 4.5%                  |
| IP_90min      | 55,323,612  | 1,373,512      | 2.5%                 | 53,950,100 | 97.5%                | 51,364,702     | 95.2%                 | 2,585,398         | 4.8%                  |
| IP_360min     | 62,691,237  | 1,596,832      | 2.5%                 | 61,484,366 | 98.1%                | 58,894,000     | 95.8%                 | 2,590,366         | 4.2%                  |
| IP_1440min    | 64,460,688  | 1,206,871      | 1.9%                 | 63,129,110 | 97.9%                | 60,192,825     | 95.3%                 | 2,936,285         | 4.7%                  |

**Supplemental Table S1.** Numbers of reads mapped to human genome (hg38) and yeast genome (sacCer3)

| Experiment           | Primer Name    | Sequence                                                                                         |
|----------------------|----------------|--------------------------------------------------------------------------------------------------|
| Plasmid construction | 3xHA Fw        | GATCCTACCCTTATGACGTCCCGACTACGCTGGTTACCCTTATGACGTCCCGACTATGCCGGCTACCCCTACGATGTCCCGATTACGCATGAG    |
| Plasmid construction | 3xHA Rv        | AATTCTCATGCGTAATCCGGGACATCGTAGGGGTAGCCGGCATAGTCGGGGACGTCATAAGGGTAACCAGCGTAGTCGGGGACGTCATAAGGGTAG |
| Plasmid construction | 1Fw            | ATTCCTGCAGGTCGACTCTGCTGGAGACATGAGAGCTGC                                                          |
| Plasmid construction | 1Rv            | CATAAGGGTAGGATCCGGCCGACGCTGTGGCAGGGAAACC                                                         |
| Plasmid construction | 2Fw            | GAACCGTCAGATCCGCTAGCGTCGACGGACCATCTGCTGGAGACATG                                                  |
| Plasmid construction | 2Rv            | TAGATCCGGTGGATCCGAATTCTCATGCGTAATCCGGGAC                                                         |
| qPCR                 | qPCR-45S Fw    | CCGGGGGAGGTATATCTTT                                                                              |
| qPCR                 | qPCR-45S Rv    | CCAACCTCTCCGACGACA                                                                               |
| qPCR                 | qPCR-5S Fw     | CCTGAACGCGCCCGATCTC                                                                              |
| qPCR                 | qPCR-5S Rv     | AAGCCTACAGCACCCGGTATTC                                                                           |
| qPCR                 | qPCR-RAB5B Fw  | GGTCAGTAGCGCCTTCCTA                                                                              |
| qPCR                 | qPCR-RAB5B Rv  | GAGGCGGGTCAAAGTGAAAC                                                                             |
| qPCR                 | qPCR-RPS9 Fw   | TCTCGTGACGTTTTACGCACC                                                                            |
| qPCR                 | qPCR-RPS9 Rv   | CTCCCTACTTCTCAGGTTTCCACT                                                                         |
| qPCR                 | qPCR-chr8NC Fw | CCATCCCCTAGGGAGAAAA                                                                              |
| qPCR                 | qPCR-chr8NC Rv | ATGCAACAGCTGTGAGGTGA                                                                             |

**Supplemental Table S2.** Primer list

| <b>GEO accession</b>          | <b>Experiment</b>           | <b>Cell line</b> | <b>Reference</b>     |
|-------------------------------|-----------------------------|------------------|----------------------|
| GSE133729                     | TBP-ERT2 ChIP-seq           | HEK293           | This study           |
| DRX000062 (SRA)               | MNase-seq                   | HEK293           | Sugano et al. 2010.  |
| GSE31477 (sample GSM935534)   | pol II ChIP-seq (Ab: 8WG16) | HEK293           | ENCODE project       |
| GSE97827 (sample GSM2579073)  | pol II Ser5-P ChIP-seq      | HEK293           | Fong et al. 2017.    |
| GSE97827 (sample GSM2579070)  | pol II Ser7-P ChIP-seq      | HEK293           | Fong et al. 2017.    |
| GSE97827 (sample GSM2579063)  | pol II Ser2-P ChIP-seq      | HEK293           | Fong et al. 2017.    |
| GSE31477 (sample GSM935302)   | KAT2A(GCN5) ChIP-seq        | HeLa-S3          | ENCODE project       |
| GSE127427 (sample GSM3634283) | EP300 ChIP-seq              | HeLa-S3          | ENCODE project       |
| GSE31477 (sample GSM935511)   | SMARCA4(BRG1) ChIP-seq      | HeLa-S3          | ENCODE project       |
| GSE32465 (sample GSM803455)   | TAF1 ChIP-seq               | HeLa-S3          | ENCODE project       |
| GSE37403 (sample GSM917814)   | SNAPC1 ChIP-seq             | MCF10A           | Baillat et al. 2012. |
| GSE32970 (sample GSM1008573)  | DNase-seq                   | HEK293T          | ENCODE project       |
| GSE118739 (sample GSM3346248) | POLR3A ChIP-seq             | HEK293           | Choquet et al. 2019. |
| GSE103719 (sample GSM2779677) | PRO-seq                     | HEK293           | Woo et al. 2018.     |

**Supplemental Table S3.** GEO accession numbers of publicly available datasets used in this study
